# Supplementary material for: Towards a quantitative lithostratigraphy of Pleistocene glaciofluvial deposits in the southern Upper Rhine Graben
Source: Copernicus journal article supplement (doi:10.5194/egqsj-73-239-2024), 2024-12-09
Supplement: Supplementary file 1 [file egqsj-73-239-2024-supplement.pdf]

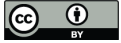

*Supplement of*

## **Towards a quantitative lithostratigraphy of Pleistocene glaciofluvial deposits in the southern Upper Rhine Graben**

**Lukas Gegg et al.**

*Correspondence to:* Lukas Gegg ([lukas.gegg@geologie.uni-freiburg.de](mailto:lukas.gegg@geologie.uni-freiburg.de))

The copyright of individual parts of the supplement might differ from the article licence.

L. Gegg et al.: Quantitative lithostratigraphy of Pleistocene glaciofluvial deposits

Table S1: Properties of gravel samples from Elzwiesen boreholes ELZ-a/-b/-c.

| sample<br>(depth in m) | number of clasts $n_{tot}$ | number of<br>limestones $n_{lst}$ | Morphometrics |               |     |     |     | Petrographic composition |                         |                     |           |                       |                          |           |                         |             |       |               |               |             |        |           |        |             |             |                   |             |
|------------------------|----------------------------|-----------------------------------|---------------|---------------|-----|-----|-----|--------------------------|-------------------------|---------------------|-----------|-----------------------|--------------------------|-----------|-------------------------|-------------|-------|---------------|---------------|-------------|--------|-----------|--------|-------------|-------------|-------------------|-------------|
|                        |                            |                                   | $D_{50}$ [mm] | $D_{90}$ [mm] | C40 | RWR | RA  | dark grey<br>limestone   | light grey<br>limestone | yellow<br>limestone | dolostone | sandstone,<br>generic | conglomerate,<br>generic | Verrucano | Taveyannaz<br>sandstone | radiolarite | chert | white granite | green granite | red granite | aplite | quartzite | gneiss | amphibolite | cataclasite | volcanic, undiff. | vein quartz |
| ELZ-a<br>3-4           | 110                        | 40                                | 12.5          | 48.5          | 43% | 43% | 3%  | 13%                      | 15%                     | 8%                  | -         | 6%                    | 1%                       | -         | 1%                      | 15%         | 5%    | 5%            | -             | 7%          | -      | 5%        | 5%     | 1%          | -           | 5%                | 8%          |
| ELZ-a<br>6-7           | 120                        | 40                                | 10.5          | 48.5          | 58% | 50% | 3%  | 23%                      | 5%                      | 5%                  | -         | 3%                    | -                        | -         | 1%                      | 18%         | 6%    | 4%            | 1%            | 4%          | -      | 5%        | 7%     | -           | -           | 1%                | 17%         |
| ELZ-a<br>9-10          | 104                        | 35                                | 10.5          | 43.5          | 63% | 49% | 3%  | 20%                      | 10%                     | 4%                  | -         | 6%                    | -                        | -         | -                       | 6%          | 5%    | 12%           | 1%            | 6%          | -      | 9%        | 10%    | -           | -           | 2%                | 12%         |
| ELZ-a<br>12-13         | 126                        | 45                                | 13.0          | 54.0          | 62% | 44% | -   | 20%                      | 11%                     | 5%                  | -         | 6%                    | -                        | -         | -                       | 21%         | 2%    | 3%            | 1%            | 2%          | -      | 10%       | 7%     | 1%          | 1%          | 2%                | 9%          |
| ELZ-a<br>16-17         | 116                        | 43                                | 10.0          | 50.5          | 47% | 51% | 5%  | 21%                      | 10%                     | 6%                  | -         | 7%                    | -                        | -         | 1%                      | 8%          | 3%    | 6%            | -             | 3%          | -      | 14%       | 7%     | 2%          | -           | 2%                | 11%         |
| ELZ-a<br>19-20         | 114                        | 28                                | 19.0          | 62.0          | 50% | 25% | -   | 11%                      | 8%                      | 6%                  | -         | 10%                   | -                        | -         | 2%                      | 15%         | 7%    | 4%            | -             | 1%          | -      | 22%       | 4%     | 1%          | -           | -                 | 11%         |
| ELZ-a<br>24-25         | 75                         | 23                                | 13.5          | 69.0          | 65% | 30% | -   | 7%                       | 20%                     | 4%                  | -         | 5%                    | -                        | -         | -                       | 13%         | 1%    | 5%            | 1%            | -           | -      | 19%       | 9%     | 1%          | -           | 3%                | 11%         |
| ELZ-a<br>27-28         | 108                        | 24                                | 13.5          | 54.5          | 92% | 42% | 8%  | 7%                       | 11%                     | 4%                  | -         | 6%                    | -                        | -         | 1%                      | 14%         | 3%    | 4%            | 1%            | 4%          | -      | 21%       | 7%     | -           | -           | 2%                | 15%         |
| ELZ-a<br>31-32         | 115                        | 26                                | 14.0          | 50.5          | 54% | 31% | 12% | 3%                       | 12%                     | 7%                  | -         | 7%                    | -                        | -         | -                       | 10%         | 7%    | 3%            | 1%            | -           | -      | 26%       | 5%     | 1%          | 1%          | 2%                | 15%         |
| ELZ-a<br>34-35         | 109                        | 27                                | 9.0           | 52.0          | 67% | 44% | 4%  | 5%                       | 14%                     | 6%                  | -         | 6%                    | -                        | -         | -                       | 17%         | 9%    | 9%            | -             | 1%          | -      | 14%       | 6%     | 2%          | -           | -                 | 11%         |
| ELZ-a<br>38-39         | 149                        | 43                                | 24.0          | 58.5          | 53% | 33% | 12% | 10%                      | 13%                     | 5%                  | -         | 9%                    | -                        | -         | 1%                      | 11%         | 5%    | 4%            | 1%            | -           | -      | 19%       | 6%     | 1%          | -           | -                 | 14%         |
| ELZ-b<br>2-3           | 88                         | 28                                | 17.0          | 43.0          | 61% | 39% | 7%  | 11%                      | 14%                     | 7%                  | 1%        | 10%                   | -                        | -         | 2%                      | 11%         | 6%    | 2%            | -             | 5%          | -      | 9%        | 7%     | 8%          | -           | -                 | 7%          |
| ELZ-b<br>7-8           | 144                        | 35                                | 15.0          | 56.0          | 66% | 60% | 6%  | 13%                      | 8%                      | 3%                  | -         | 8%                    | 1%                       | -         | -                       | 11%         | 6%    | 4%            | -             | 9%          | -      | 14%       | 10%    | 3%          | -           | 3%                | 7%          |
| ELZ-b<br>11-12         | 65                         | 11                                | 8.0           | 27.0          | 18% | 27% | 9%  | 14%                      | 3%                      | -                   | -         | 2%                    | -                        | -         | -                       | 23%         | 5%    | 9%            | -             | 5%          | 2%     | 11%       | 12%    | 5%          | -           | -                 | 11%         |
| ELZ-b<br>16-17         | 122                        | 36                                | 11.0          | 50.0          | 42% | 47% | 14% | 13%                      | 13%                     | 3%                  | -         | 7%                    | -                        | -         | -                       | 11%         | 3%    | 4%            | -             | 2%          | -      | 18%       | 9%     | 3%          | -           | 2%                | 11%         |
| ELZ-b<br>18-19         | 94                         | 32                                | 7.0           | 45.0          | 59% | 25% | 9%  | 15%                      | 10%                     | 10%                 | -         | 11%                   | -                        | -         | -                       | 13%         | 3%    | 2%            | -             | -           | -      | 11%       | 6%     | 5%          | -           | -                 | 15%         |
| ELZ-b<br>21-22         | 135                        | 35                                | 10.0          | 47.0          | 66% | 31% | 9%  | 9%                       | 10%                     | 7%                  | -         | 10%                   | -                        | -         | -                       | 13%         | 2%    | 4%            | -             | 1%          | -      | 16%       | 9%     | 2%          | -           | 1%                | 16%         |
| ELZ-b<br>24-25         | 162                        | 40                                | 10.0          | 58.0          | 55% | 48% | 10% | 9%                       | 12%                     | 5%                  | -         | 11%                   | 1%                       | -         | -                       | 10%         | 7%    | 2%            | -             | 3%          | -      | 14%       | 7%     | 4%          | 1%          | 1%                | 14%         |
| ELZ-b<br>28-29         | 162                        | 51                                | 11.0          | 49.0          | 45% | 20% | 16% | 6%                       | 16%                     | 9%                  | -         | 12%                   | 1%                       | 1%        | 1%                      | 13%         | 6%    | 6%            | 1%            | 1%          | -      | 10%       | 2%     | 2%          | -           | 1%                | 14%         |
| ELZ-b<br>34-35         | 144                        | 35                                | 11.0          | 49.0          | 66% | 46% | 3%  | 5%                       | 13%                     | 6%                  | -         | 9%                    | -                        | 1%        | -                       | 15%         | 5%    | 6%            | 1%            | 1%          | -      | 10%       | 4%     | 3%          | -           | 1%                | 21%         |
| ELZ-b<br>39-40         | 88                         | 27                                | 9.0           | 40.0          | 74% | 44% | 7%  | 6%                       | 17%                     | 10%                 | -         | 9%                    | -                        | -         | -                       | 17%         | 6%    | 7%            | -             | -           | 1%     | 9%        | 7%     | 1%          | -           | -                 | 10%         |
| ELZ-b<br>42-43         | 122                        | 42                                | 21.0          | 84.0          | 62% | 31% | 10% | 7%                       | 20%                     | 8%                  | -         | 18%                   | 1%                       | -         | 2%                      | 11%         | 4%    | 7%            | -             | 2%          | -      | 7%        | 5%     | 1%          | 1%          | -                 | 7%          |
| ELZ-b<br>49-50         | 172                        | 53                                | 20.0          | 54.0          | 53% | 45% | 2%  | 9%                       | 13%                     | 9%                  | -         | 11%                   | -                        | -         | -                       | 12%         | 1%    | 6%            | -             | 1%          | -      | 18%       | 7%     | -           | -           | 1%                | 13%         |

L. Gegg et al.: Quantitative lithostratigraphy of Pleistocene glaciofluvial deposits

Table S1 (continued): Properties of gravel samples from Elzwiesen boreholes ELZ-a/-b/-c. Orange shaded cells: lithofacies B / Breisgau Fm.

| sample<br>(depth in m) | number of clasts $n_{tot}$ | number of<br>limestones $n_{lst}$ | Morphometrics        |                      |     |     |     | Petrographic composition |                         |                     |           |                       |                          |           |                         |             |       |               |               |             |        |           |        |             |             |          |             |
|------------------------|----------------------------|-----------------------------------|----------------------|----------------------|-----|-----|-----|--------------------------|-------------------------|---------------------|-----------|-----------------------|--------------------------|-----------|-------------------------|-------------|-------|---------------|---------------|-------------|--------|-----------|--------|-------------|-------------|----------|-------------|
|                        |                            |                                   | D <sub>50</sub> [mm] | D <sub>90</sub> [mm] | C40 | RWR | RA  | dark grey<br>limestone   | light grey<br>limestone | yellow<br>limestone | dolostone | Sandstone,<br>generic | conglomerate,<br>generic | Verrucano | Taveyannaz<br>sandstone | radiolarite | chert | white granite | green granite | red granite | aplite | quartzite | gneiss | amphibolite | cataclasite | volcanic | vein quartz |
| ELZ-b<br>54-55         | 136                        | 27                                | 19.0                 | 59.0                 | 44% | 44% | 4%  | 4%                       | 7%                      | 9%                  | -         | 11%                   | 1%                       | -         | -                       | 14%         | 13%   | 9%            | -             | 1%          | -      | 13%       | 5%     | -           | 1%          | 1%       | 13%         |
| ELZ-b<br>56-57         | 87                         | 17                                | 8.0                  | 52.0                 | 82% | 47% | -   | 6%                       | 13%                     | 1%                  | -         | 11%                   | -                        | -         | -                       | 11%         | 8%    | 7%            | -             | 3%          | -      | 8%        | 8%     | 2%          | -           | 2%       | 18%         |
| ELZ-b<br>58-59         | 101                        | 37                                | 8.0                  | 41.0                 | 35% | 35% | -   | 5%                       | 16%                     | 16%                 | -         | 5%                    | -                        | -         | -                       | 11%         | 8%    | 5%            | -             | -           | -      | 14%       | 5%     | 2%          | -           | -        | 14%         |
| ELZ-b<br>60-61         | 128                        | 35                                | 10.0                 | 47.0                 | 46% | 40% | 11% | 6%                       | 12%                     | 9%                  | -         | 10%                   | -                        | -         | -                       | 9%          | 5%    | 4%            | -             | 5%          | -      | 13%       | 6%     | 1%          | -           | 2%       | 17%         |
| ELZ-c<br>3-4           | 107                        | 35                                | 16.5                 | 67.5                 | 54% | 31% | 3%  | 11%                      | 15%                     | 7%                  | -         | 7%                    | -                        | -         | -                       | 13%         | 7%    | 7%            | -             | 5%          | -      | 10%       | 6%     | 1%          | -           | 2%       | 10%         |
| ELZ-c<br>8-9           | 130                        | 40                                | 16.0                 | 54.0                 | 68% | 45% | -   | 17%                      | 10%                     | 4%                  | -         | 11%                   | -                        | 1%        | -                       | 13%         | 4%    | 7%            | -             | 6%          | -      | 4%        | 13%    | 1%          | 1%          | 2%       | 9%          |
| ELZ-c<br>12-13         | 139                        | 33                                | 14.5                 | 47.5                 | 55% | 39% | 3%  | 13%                      | 7%                      | 4%                  | -         | 11%                   | -                        | 1%        | -                       | 17%         | 2%    | 3%            | 1%            | 4%          | -      | 10%       | 7%     | 2%          | 1%          | 1%       | 17%         |
| ELZ-c<br>16-17         | 130                        | 35                                | 16.0                 | 53.6                 | 66% | 37% | 3%  | 12%                      | 12%                     | 5%                  | -         | 5%                    | 1%                       | -         | -                       | 12%         | 5%    | 6%            | -             | 2%          | 1%     | 11%       | 7%     | 1%          | -           | 2%       | 18%         |
| ELZ-c<br>19-20         | 69                         | 17                                | 52.0                 | 103.5                | 53% | 47% | -   | 3%                       | 16%                     | 6%                  | -         | 6%                    | -                        | -         | -                       | 6%          | 3%    | 1%            | -             | 1%          | -      | 33%       | 10%    | 1%          | -           | 3%       | 9%          |
| ELZ-c<br>24-25         | 145                        | 39                                | 17.0                 | 52.5                 | 67% | 36% | 3%  | 8%                       | 13%                     | 6%                  | -         | 17%                   | -                        | -         | -                       | 9%          | 6%    | 1%            | -             | 3%          | -      | 11%       | 8%     | 2%          | -           | 1%       | 15%         |
| ELZ-c<br>26-27         | 123                        | 38                                | 18.0                 | 58.0                 | 66% | 47% | 5%  | 13%                      | 13%                     | 5%                  | -         | 5%                    | -                        | 1%        | 2%                      | 12%         | 5%    | 4%            | -             | 6%          | -      | 15%       | 7%     | -           | -           | 2%       | 12%         |
| ELZ-c<br>28-29         | 122                        | 34                                | 12.5                 | 45.5                 | 53% | 47% | -   | 8%                       | 12%                     | 7%                  | -         | 8%                    | -                        | -         | -                       | 14%         | 4%    | 7%            | -             | 4%          | -      | 16%       | 5%     | 1%          | -           | -        | 13%         |
| ELZ-c<br>34-35         | 117                        | 29                                | 24.5                 | 61.5                 | 62% | 52% | -   | 4%                       | 13%                     | 9%                  | -         | 7%                    | 1%                       | -         | 1%                      | 18%         | 4%    | 7%            | -             | 2%          | -      | 13%       | 4%     | 1%          | 1%          | 1%       | 15%         |
| ELZ-c<br>38-39         | 106                        | 25                                | 19.0                 | 84.5                 | 52% | 56% | 8%  | 6%                       | 12%                     | 5%                  | -         | 8%                    | -                        | -         | 1%                      | 23%         | 4%    | 4%            | -             | 2%          | -      | 8%        | 5%     | 2%          | -           | -        | 23%         |
